# Supplementary material
Source: HighWire-hosted journal article supplement (https://jme.bmj.com/content/43/10/657)
Supplement: inline-supplementary-material-1 [file inline-supplementary-material-1.pdf]

**Appendix 1. PUBMED literature search****Date of search: February 15<sup>th</sup>, 2016**

| <b>Search</b> | <b>Terms</b>                                                                          | <b>Hits</b> |
|---------------|---------------------------------------------------------------------------------------|-------------|
| #1            | ((vulnerab*[Title/Abstract]) AND pregnan*[Title/Abstract]) AND ethic*[Title/Abstract] | 86          |
| #2            | research*[Title/Abstract] OR stud*[Title/Abstract] OR trial*[Title/Abstract]          | 9020431     |
| #3            | #1 AND # 2                                                                            | 59          |
